# Supplementary material for: Enriched Surface Oxygen Vacancies of Fe2(MoO4)3 Catalysts for a PDS-Activated photoFenton System
Source: MDPI journal article supplement (doi:10.3390/molecules28010333), 2022-12-31
Supplement: s1 [file s1]

# **Enriched surface oxygen vacancies of Fe<sub>2</sub>(MoO<sub>4</sub>)<sub>3</sub> catalysts for a PDS-activated photoFenton system**

Yang Qiu,<sup>a,†</sup> Chuanxi Yang,<sup>b,†</sup> Huimin Zhou,<sup>a</sup> Jinqiu Zang,<sup>b</sup> Yuqi Fan,<sup>a</sup> Feng Dang,<sup>c</sup>  
Guanwei Cui<sup>d\*</sup> and Weiliang Wang<sup>b\*</sup>

<sup>a</sup>Institute of Environment and Ecology, Shandong Normal University, Jinan, 250358  
China

<sup>b</sup>School of Environmental and Municipal Engineering, Qingdao University of  
Technology, Qingdao 266520, China

<sup>c</sup>Key Laboratory for Liquid-Solid Structural Evolution and Processing of Materials,  
Shandong University, Jinan 250061, China

<sup>d</sup>College of Chemistry, Chemical Engineering and Materials Science, Key Laboratory  
of Molecular and Nano Probes, Ministry of Education, Shandong Normal University,  
Jinan 250014, China

<sup>†</sup> These authors contribute to this work equally.

\* Corresponding authors: cuiguanwei@sdsu.edu.cn (G.W. Cui); sdqcsdsu@163.com  
(W.L. Wang)

## **Table of contents**

|                                                                             |          |
|-----------------------------------------------------------------------------|----------|
| <b>Figure S1. SEM image of FMO-6</b>                                        | <b>3</b> |
| <b>Figure S2. SAED image of FMO-6</b>                                       | <b>4</b> |
| <b>Figure S3. Catalytic degradation efficiencies for different systems.</b> | <b>5</b> |
| <b>Figure S4. XRD pattern for FMO-6 after cycling</b>                       | <b>6</b> |

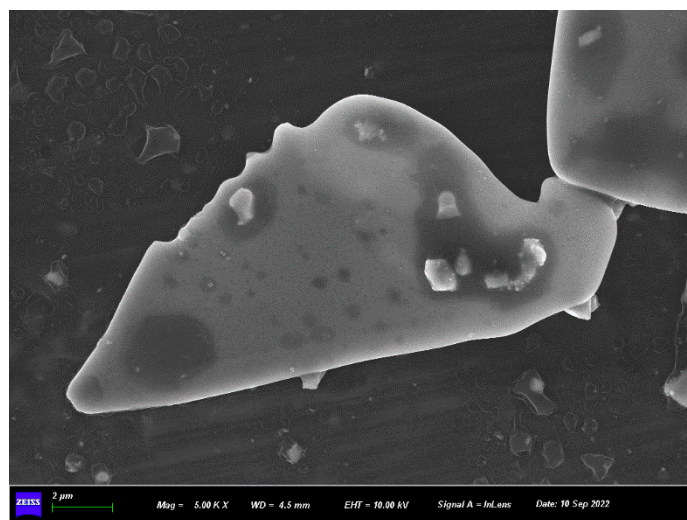

**Figure S1.** SEM image of FMO-6.

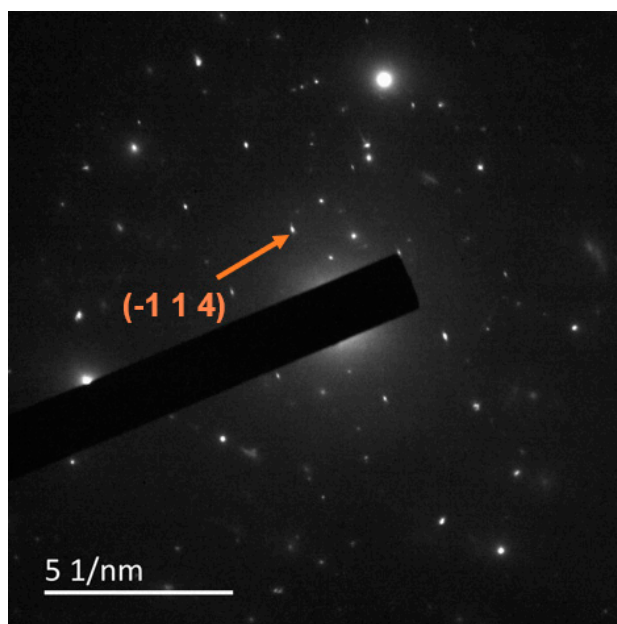

**Figure S2.** SAED image of FMO-6.

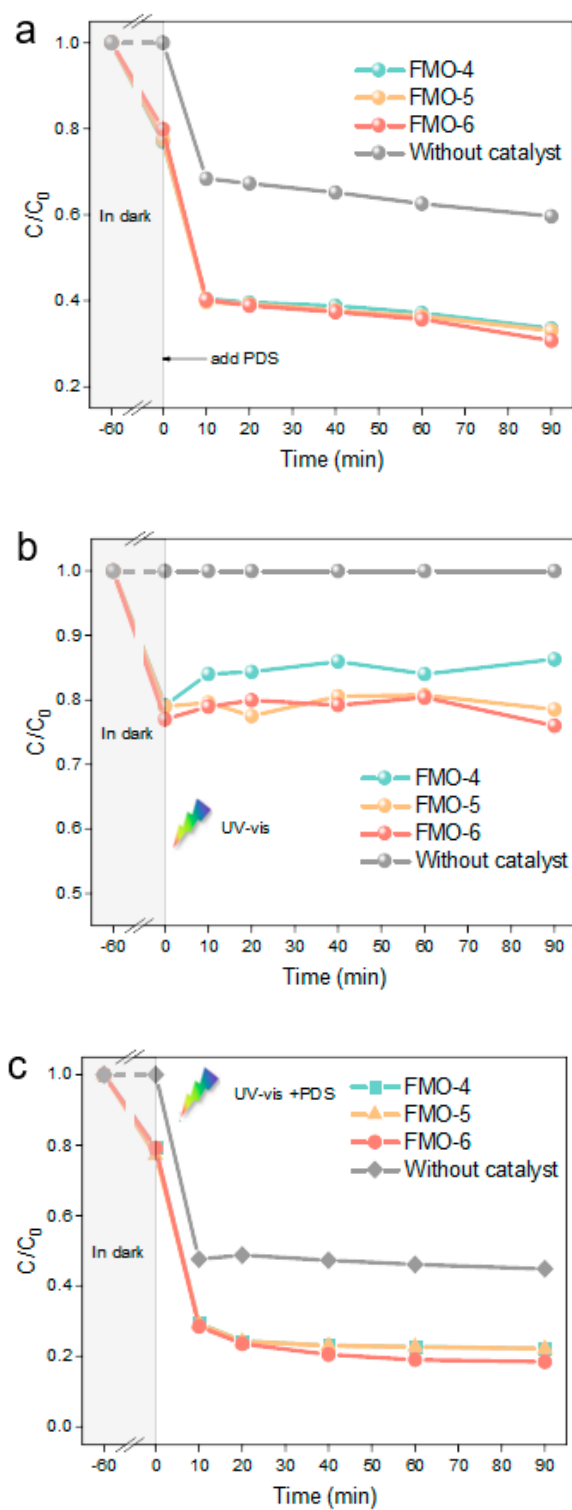

**Figure S3.** Catalytic degradation efficiencies for different systems (a) PDS, (b) UV-vis, (c) PDS and UV-vis (25°C, 0.5mM PDS, 20mg/L MO, 0.5g/L FMO pH=6, Xenon lamps 1000w).

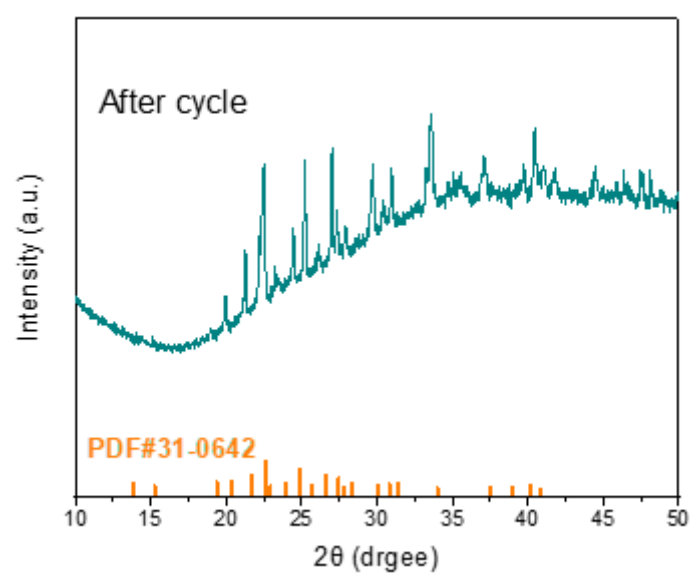

**Figure S4.** XRD pattern for FMO-6 after cycling.
